# Supplementary material
Source: publisher figshare collection journal article supplement (https://sage.figshare.com/ndownloader/files/13569665)
Supplement: Supplementary file 1 [file 13569665]

## Sheet: Correlations
			Pretest											Covariates																														Posttest
			Big Five					Vocational interest orientations						Demographics		Family background						School grades			General cognitive abilities		Achievement tests							Self-concept							Behavior			Bis Five					Vocational interest orientations
			Extraversion	Agreeableness	Conscientiousness	Neuroticism	Openness	Realistic	Investigative	Artistic	Social	Enterprising	Conventional	Sex	Age	Educational background	HISEI	Migration status	Number of books	Communication within family	Perceived wealth	German	Mathematics	Second language	Figural	Verbal	German	C-test	Reading comprehension	Mathematics	Biology	Economy	Technology	Mathematics	Verbal	Intellectual	English	Economy	Relation with parents	Technology	Risk behavior	Norm violation	Life satisfaction	Extraversion	Agreeableness	Conscientiousness	Neuroticism	Openness	Realistic
Pretest	Big Five	Extraversion	1	0.141143	0.201051	-0.208033	0.159446	-0.10688	-0.18295	0.0493895	0.295987	0.476248	0.0537568	-0.106581	0.0339723	0.0787909	0.0845766	0.0868141	-0.0490309	0.119715	0.00205455	-0.0763633	0.122126	-0.0931643	-0.179948	-0.153304	-0.198799	-0.085206	-0.164877	-0.10034	-0.154231	-0.0992907	-0.0982167	-0.0693457	0.274891	0.175514	0.111892	0.130255	0.297951	-0.0196163	0.282086	0.165777	0.270442	0.67793	0.00117091	0.214495	-0.210157	0.029017	-0.0915356
		Agreeableness	0.141143	1	0.124518	-0.11635	-0.00865717	-0.1519	-0.135763	0.00430351	0.237628	0.0390136	0.0475632	-0.178178	-0.061187	0.0677467	0.0751746	0.0202938	-0.0500914	0.0361955	-0.0812124	-0.062647	-0.0139736	-0.0647798	-0.166775	-0.0645019	-0.0954554	0.0369293	-0.0527215	-0.101605	-0.105195	-0.12534	-0.160157	0.00475958	0.0898157	0.0881825	0.105897	-0.0501938	0.181948	-0.164337	-0.0153216	-0.180684	0.238625	0.132246	0.473239	0.161499	-0.121949	0.00025639	-0.0776394
		Conscientiousness	0.201051	0.124518	1	-0.118711	0.13903	0.0408819	0.0871447	-0.0204489	0.105695	0.148055	0.261678	-0.0832014	-0.0304063	-0.0217888	-0.0872793	0.0363699	-0.0478868	0.04681	-0.00874814	-0.156159	-0.106335	-0.0934602	-0.0181242	0.0320917	0.0208314	0.0194157	0.0484425	0.00924858	-0.0904602	-0.0139351	0.0110248	0.22302	0.148582	0.189603	0.0342361	0.17003	0.331738	0.124839	-0.137637	-0.25779	0.219564	0.101613	-0.0179205	0.401602	-0.015898	0.0131511	0.0157197
		Neuroticism	-0.208033	-0.11635	-0.118711	1	0.1141	-0.119443	-0.0734004	0.18966	0.176973	-0.076231	0.00131192	-0.241543	-0.0900589	-0.143937	-0.130548	0.0194716	0.0326367	-0.116485	-0.0345459	-0.0705158	-0.0716763	-0.0668914	0.107678	0.0788053	0.0566607	0.115665	0.102639	-0.00595598	-0.0233948	0.00390058	-0.0959344	-0.123665	-0.0496652	-0.385246	-0.069435	-0.213049	-0.28762	-0.19646	-0.0378307	-0.034037	-0.305253	-0.133236	-0.00857926	-0.084631	0.408205	0.0426104	-0.0897306
		Openness	0.159446	-0.00865717	0.13903	0.1141	1	-0.120972	0.0390495	0.641903	0.2356	0.0922525	-0.0886197	-0.28713	-0.0286329	0.0148995	-0.031031	0.146418	0.078286	-0.0225074	0.0879841	-0.151722	0.0933643	-0.118228	0.0442918	0.0823185	0.0253557	0.12104	0.0713483	-0.0875282	-0.0315232	-0.019206	-0.078278	-0.132866	0.344581	-0.0179902	0.132967	-0.0642504	0.0390254	-0.0186124	-0.051332	-0.0329374	-0.12199	0.102553	0.0628892	0.0272094	0.164566	0.569352	-0.086959
	Vocational interest orientations	Realistic	-0.10688	-0.1519	0.0408819	-0.119443	-0.120972	1	0.601901	-0.214753	-0.363806	-0.132589	0.0780055	0.56868	0.098476	0.00218051	0.0209016	-0.135842	0.018788	-0.0612911	-0.0498024	0.200618	-0.0133366	0.272319	0.177338	0.185396	-0.0385617	-0.167921	-0.0277142	0.279116	0.164728	0.101428	0.522825	0.254653	-0.291051	0.106153	-0.251186	0.176437	-0.0283472	0.777858	-0.00353124	0.180571	0.058825	-0.150582	-0.165857	-0.0399435	-0.0599634	-0.0519493	0.695019
		Investigative	-0.18295	-0.135763	0.0871447	-0.0734004	0.0390495	0.601901	1	0.0923954	-0.113047	-0.000220837	0.216911	0.415347	0.0974531	0.0372723	-0.0642846	-0.036863	0.0456268	-0.0443194	-0.003563	0.0292828	-0.0755442	0.0837257	0.244339	0.162404	0.0894893	0.0338374	0.0675369	0.224219	0.271247	0.198417	0.387723	0.207012	-0.0999928	0.192777	-0.0568622	0.278501	0.00993674	0.410279	-0.132807	0.0144636	-0.00299569	-0.259138	-0.214927	-0.0532091	-0.0458505	0.0120735	0.42549
		Artistic	0.0493895	0.00430351	-0.0204489	0.18966	0.641903	-0.214753	0.0923954	1	0.463904	0.280818	0.133737	-0.380708	-0.0666109	0.0278652	0.00180034	0.119925	0.128835	0.0176838	0.0897152	-0.176299	0.201751	-0.157277	-0.0294366	-0.0700488	-0.00242878	0.160223	0.0700837	-0.211239	-0.0782472	-0.00745657	-0.260041	-0.305129	0.34608	-0.0578614	0.257082	-0.0642175	-0.0221598	-0.307658	-0.0558774	-0.0202416	-0.133049	0.019104	0.0835384	-0.0488325	0.20973	0.482303	-0.244835
		Social	0.295987	0.237628	0.105695	0.176973	0.2356	-0.363806	-0.113047	0.463904	1	0.563194	0.264491	-0.443462	0.0145844	0.022551	0.0561982	0.0770944	0.111357	0.068535	0.0310708	-0.194496	0.13596	-0.154148	-0.142038	-0.160847	-0.0659535	0.046241	-0.11093	-0.256516	-0.151821	-0.135193	-0.349054	-0.240401	0.253676	-0.0546061	0.188266	-0.000755485	0.0753698	-0.455606	0.051363	-0.00569175	-0.0295836	0.222231	0.0519402	0.0887818	0.112843	0.115972	-0.382973
		Enterprising	0.476248	0.0390136	0.148055	-0.076231	0.0922525	-0.132589	-0.000220837	0.280818	0.563194	1	0.552373	-0.120295	0.0673402	0.044478	0.0361924	0.087668	-0.0342445	0.170353	0.0330468	-0.0923426	0.0975514	-0.147028	-0.112905	-0.192603	-0.137468	-0.0443782	-0.0825503	-0.164988	-0.14061	0.0077859	-0.17384	-0.0546996	0.216385	0.131108	0.130195	0.275969	0.196617	-0.232365	0.142848	0.118819	0.123696	0.374585	-0.141309	0.16412	-0.0951999	-0.0521956	-0.208491
		Conventional	0.0537568	0.0475632	0.261678	0.00131192	-0.0886197	0.0780055	0.216911	0.133737	0.264491	0.552373	1	0.0284512	0.0977388	-0.0609447	-0.0503317	0.0290361	-0.0962681	0.0909394	-0.0652513	-0.0530886	-0.00102427	-0.00690367	-0.0373651	-0.0460234	-0.0567956	-0.0749006	-0.046572	-0.0835326	-0.0865259	0.0724554	-0.0183759	0.0832898	0.0544361	0.0893533	-0.00463552	0.386663	0.0869023	-0.109717	-0.0177784	-0.0476928	0.0601375	0.0368793	-0.145895	0.147385	-0.0185455	-0.173527	-0.0494148
Covariates	Demographics	Sex	-0.106581	-0.178178	-0.0832014	-0.241543	-0.28713	0.56868	0.415347	-0.380708	-0.443462	-0.120295	0.0284512	1	0.0663722	0.0388323	0.0780988	-0.111051	-0.0300029	0.0385619	-0.0848536	0.21702	0.0196483	0.093654	0.207165	0.0368042	-0.00546253	-0.0764483	-0.00249625	0.226379	0.199493	0.190262	0.478204	0.125878	-0.153992	0.17122	-0.0320222	0.316201	0.0054311	0.429869	0.0169622	0.222854	0.102603	-0.10884	-0.167217	-0.135545	-0.179778	-0.0846938	0.47183
		Age	0.0339723	-0.061187	-0.0304063	-0.0900589	-0.0286329	0.098476	0.0974531	-0.0666109	0.0145844	0.0673402	0.0977388	0.0663722	1	-0.0326652	0.00171177	0.0550527	0.02513	0.0265026	-0.00095169	0.0869057	0.0285482	0.0782635	-0.0742783	0.00407401	-0.0875435	-0.112074	-0.0593889	0.0511777	0.0255676	-0.0373206	0.00255753	0.02437	-0.0472154	-0.0235947	-0.0779286	0.0826175	0.0954006	0.0796939	0.198836	0.247072	0.01184	0.056209	-0.0854814	-0.0207841	0.0113402	-0.0144947	0.0804467
	Family background	Educational background	0.0787909	0.0677467	-0.0217888	-0.143937	0.0148995	0.00218051	0.0372723	0.0278652	0.022551	0.044478	-0.0609447	0.0388323	-0.0326652	1	0.438942	-0.0292165	0.297898	0.107992	0.0786604	0.0231328	-0.0336671	-0.0855683	-0.0107329	-0.0188268	-0.0508933	0.0223279	-0.0201974	-0.00716965	-0.000981169	-0.0387555	-0.0101356	0.0200017	0.0152987	0.112478	0.0968187	0.0325822	0.106645	0.0572438	0.0150987	0.10603	0.159456	0.0711929	0.039534	-0.0783886	-0.0789883	0.00602995	-0.0403153
		HISEI	0.0845766	0.0751746	-0.0872793	-0.130548	-0.031031	0.0209016	-0.0642846	0.00180034	0.0561982	0.0361924	-0.0503317	0.0780988	0.00171177	0.438942	1	-0.228805	0.254866	0.19133	0.001477	0.0817095	0.0583481	0.00161653	-0.110375	-0.0376107	-0.100549	-0.100155	-0.0214435	-0.067578	0.0244456	-0.060425	-0.0324795	0.0117889	0.0225467	0.0516384	0.013539	0.0720493	0.0589253	0.044467	0.0863619	0.107438	0.126202	0.070497	0.0533659	-0.0436345	-0.138152	-0.0341111	-0.0170964
		Migration status	0.0868141	0.0202938	0.0363699	0.0194716	0.146418	-0.135842	-0.036863	0.119925	0.0770944	0.087668	0.0290361	-0.111051	0.0550527	-0.0292165	-0.228805	1	-0.156288	0.089381	0.0717535	0.0569185	0.0803257	-0.00468037	-0.109234	-0.038583	-0.109403	0.0242673	-0.1054	-0.15964	-0.164478	-0.191738	-0.251116	-0.0148371	0.0582741	-0.0412513	0.0991583	-0.0825013	-0.0285874	-0.0922397	-0.213894	0.0106364	-0.0556819	0.069995	0.090195	0.00942671	0.0191155	0.133223	-0.090337
		Number of books	-0.0490309	-0.0500914	-0.0478868	0.0326367	0.078286	0.018788	0.0456268	0.128835	0.111357	-0.0342445	-0.0962681	-0.0300029	0.02513	0.297898	0.254866	-0.156288	1	0.076957	0.210207	0.0640936	-0.00198683	0.01093	0.0393903	0.0293706	0.0227896	-0.0742622	0.00784709	-0.0314939	0.115393	0.0253035	-0.0133708	0.00941365	-0.0297878	0.0165016	0.0250873	-0.0291163	-0.00719692	0.0107544	-0.100857	0.0594277	-0.0314746	0.0203186	0.0952713	-0.207368	0.0350092	0.0764241	-0.0316637
		Communication within family	0.119715	0.0361955	0.04681	-0.116485	-0.0225074	-0.0612911	-0.0443194	0.0176838	0.068535	0.170353	0.0909394	0.0385619	0.0265026	0.107992	0.19133	0.089381	0.076957	1	0.0301457	-0.000195373	0.0461155	0.0223233	-0.149412	-0.0288972	-0.0540491	-0.123657	-0.0346409	-0.115484	-0.102536	0.0223347	-0.0839956	0.0389134	0.0590052	0.108707	-0.0200509	0.0834875	0.161419	-0.0181616	0.0287123	0.0148688	0.103872	0.123491	-0.0578819	0.0329077	-0.0921934	0.0132109	-0.0248261
		Perceived wealth	0.00205455	-0.0812124	-0.00874814	-0.0345459	0.0879841	-0.0498024	-0.003563	0.0897152	0.0310708	0.0330468	-0.0652513	-0.0848536	-0.00095169	0.0786604	0.001477	0.0717535	0.210207	0.0301457	1	-0.0477441	0.0169046	-0.0709515	0.0549196	0.0292792	0.0881761	0.0536081	0.0789897	-0.0808159	-0.00721119	0.0193159	-0.0851378	-0.111181	0.0432472	-0.0818105	0.108231	0.00642316	0.116924	-0.0720616	-0.104715	0.0451911	0.0513151	0.0208674	0.0206006	-0.0138683	-0.034324	0.105073	-0.10616
	School grades	German	-0.0763633	-0.062647	-0.156159	-0.0705158	-0.151722	0.200618	0.0292828	-0.176299	-0.194496	-0.0923426	-0.0530886	0.21702	0.0869057	0.0231328	0.0817095	0.0569185	0.0640936	-0.000195373	-0.0477441	1	0.129381	0.297068	-0.225556	-0.0617833	-0.263066	-0.285465	-0.165377	-0.0935255	-0.128695	-0.215129	0.00166708	0.0395667	-0.405723	-0.109998	-0.134718	-0.0815797	-0.0414544	0.179112	0.0588536	0.101627	0.00900939	-0.0303216	0.00366368	-0.111507	-0.0597442	-0.0579841	0.193396
		Mathematics	0.122126	-0.0139736	-0.106335	-0.0716763	0.0933643	-0.0133366	-0.0755442	0.201751	0.13596	0.0975514	-0.00102427	0.0196483	0.0285482	-0.0336671	0.0583481	0.0803257	-0.00198683	0.0461155	0.0169046	0.129381	1	0.0849288	-0.148147	-0.171157	-0.173702	-0.0764341	-0.0696608	-0.313147	-0.0847102	-0.0947642	-0.154623	-0.61935	0.2326	-0.060663	0.196575	-0.00815252	-0.00518787	-0.0445498	0.0949734	0.197723	-0.00248857	0.053627	-0.00221348	-0.0475084	-0.00215217	0.115277	-0.105408
		Second language	-0.0931643	-0.0647798	-0.0934602	-0.0668914	-0.118228	0.272319	0.0837257	-0.157277	-0.154148	-0.147028	-0.00690367	0.093654	0.0782635	-0.0855683	0.00161653	-0.00468037	0.01093	0.0223233	-0.0709515	0.297068	0.0849288	1	-0.136305	-0.000908632	-0.188186	-0.427478	-0.313955	-0.0378801	-0.144196	-0.114412	0.0606418	0.0770613	-0.370745	-0.162691	-0.610954	0.0109656	-0.0533841	0.257553	0.0310751	0.019386	-0.0516071	-0.00379626	-0.0137802	-0.0973014	-0.0803299	-0.123093	0.14766
	General cognitive abilities	Figural	-0.179948	-0.166775	-0.0181242	0.107678	0.0442918	0.177338	0.244339	-0.0294366	-0.142038	-0.112905	-0.0373651	0.207165	-0.0742783	-0.0107329	-0.110375	-0.109234	0.0393903	-0.149412	0.0549196	-0.225556	-0.148147	-0.136305	1	0.326614	0.403435	0.304035	0.324092	0.383843	0.433565	0.415517	0.387031	0.0913251	0.08562	0.0738993	0.0407403	0.185066	-0.0859555	0.190448	-0.155317	-0.0147677	-0.0825641	-0.251296	-0.156156	-0.142993	0.122598	0.00381857	0.149374
		Verbal	-0.153304	-0.0645019	0.0320917	0.0788053	0.0823185	0.185396	0.162404	-0.0700488	-0.160847	-0.192603	-0.0460234	0.0368042	0.00407401	-0.0188268	-0.0376107	-0.038583	0.0293706	-0.0288972	0.0292792	-0.0617833	-0.171157	-0.000908632	0.326614	1	0.33651	0.100292	0.191427	0.371482	0.261831	0.181756	0.232628	0.252446	-0.0678765	0.0675919	-0.122237	-0.0324824	-0.057311	0.19397	-0.160728	-0.0719591	-0.0558647	-0.167252	0.0244656	-0.0509497	0.0359908	0.0553896	0.223333
	Achievement tests	German	-0.198799	-0.0954554	0.0208314	0.0566607	0.0253557	-0.0385617	0.0894893	-0.00242878	-0.0659535	-0.137468	-0.0567956	-0.00546253	-0.0875435	-0.0508933	-0.100549	-0.109403	0.0227896	-0.0540491	0.0881761	-0.263066	-0.173702	-0.188186	0.403435	0.33651	1	0.347977	0.370577	0.365626	0.328705	0.421343	0.189514	0.119862	0.141741	0.0308309	0.0809978	0.0116638	-0.118942	-0.00182214	-0.178804	-0.131445	-0.0863183	-0.228711	-0.0715928	-0.10834	0.12954	-0.011874	-0.0132273
		C-test	-0.085206	0.0369293	0.0194157	0.115665	0.12104	-0.167921	0.0338374	0.160223	0.046241	-0.0443782	-0.0749006	-0.0764483	-0.112074	0.0223279	-0.100155	0.0242673	-0.0742622	-0.123657	0.0536081	-0.285465	-0.0764341	-0.427478	0.304035	0.100292	0.347977	1	0.475159	0.119529	0.197435	0.242764	0.0315156	-0.0855633	0.262737	0.0547116	0.445075	-0.0928006	-0.0619797	-0.159048	-0.0650391	-0.119076	-0.0260419	-0.123783	0.0737879	-0.00758586	0.128135	0.106446	-0.12753
		Reading comprehension	-0.164877	-0.0527215	0.0484425	0.102639	0.0713483	-0.0277142	0.0675369	0.0700837	-0.11093	-0.0825503	-0.046572	-0.00249625	-0.0593889	-0.0201974	-0.0214435	-0.1054	0.00784709	-0.0346409	0.0789897	-0.165377	-0.0696608	-0.313955	0.324092	0.191427	0.370577	0.475159	1	0.162904	0.291379	0.269384	0.166948	0.0437695	0.169594	-0.0092591	0.223357	0.0186115	0.00868286	-0.0241795	-0.105075	-0.0605018	0.0221604	-0.133016	0.0304149	-0.0312228	0.0310131	-0.00443849	-0.040292
		Mathematics	-0.10034	-0.101605	0.00924858	-0.00595598	-0.0875282	0.279116	0.224219	-0.211239	-0.256516	-0.164988	-0.0835326	0.226379	0.0511777	-0.00716965	-0.067578	-0.15964	-0.0314939	-0.115484	-0.0808159	-0.0935255	-0.313147	-0.0378801	0.383843	0.371482	0.365626	0.119529	0.162904	1	0.332777	0.270131	0.402715	0.377446	-0.119073	0.126657	-0.113721	0.0344202	-0.0626104	0.307227	-0.0218406	0.0377061	0.0283647	-0.132885	-0.0893314	-0.122517	0.0116677	-0.0528864	0.283185
		Biology	-0.154231	-0.105195	-0.0904602	-0.0233948	-0.0315232	0.164728	0.271247	-0.0782472	-0.151821	-0.14061	-0.0865259	0.199493	0.0255676	-0.000981169	0.0244456	-0.164478	0.115393	-0.102536	-0.00721119	-0.128695	-0.0847102	-0.144196	0.433565	0.261831	0.328705	0.197435	0.291379	0.332777	1	0.258086	0.347472	0.143588	0.0853904	0.101252	0.060033	0.0831541	-0.0517199	0.16079	-0.0873984	0.0391309	0.00900089	-0.167762	-0.0648634	-0.0796842	0.00751251	0.0228638	0.167909
		Economy	-0.0992907	-0.12534	-0.0139351	0.00390058	-0.019206	0.101428	0.198417	-0.00745657	-0.135193	0.0077859	0.0724554	0.190262	-0.0373206	-0.0387555	-0.060425	-0.191738	0.0253035	0.0223347	0.0193159	-0.215129	-0.0947642	-0.114412	0.415517	0.181756	0.421343	0.242764	0.269384	0.270131	0.258086	1	0.310964	0.0365593	0.0906787	0.0656024	-0.00582475	0.293282	0.0109495	0.0729261	-0.0720894	-0.133594	-0.0208951	-0.161111	-0.145586	-0.0956346	0.0168266	-0.0862448	0.0280895
		Technology	-0.0982167	-0.160157	0.0110248	-0.0959344	-0.078278	0.522825	0.387723	-0.260041	-0.349054	-0.17384	-0.0183759	0.478204	0.00255753	-0.0101356	-0.0324795	-0.251116	-0.0133708	-0.0839956	-0.0851378	0.00166708	-0.154623	0.0606418	0.387031	0.232628	0.189514	0.0315156	0.166948	0.402715	0.347472	0.310964	1	0.219224	-0.115076	0.142338	-0.132092	0.192064	0.00472657	0.482464	0.000651878	0.0372335	0.0438654	-0.161013	-0.131071	-0.0753256	-0.0771479	-0.0497299	0.39674
	Self-concept	Mathematics	-0.0693457	0.00475958	0.22302	-0.123665	-0.132866	0.254653	0.207012	-0.305129	-0.240401	-0.0546996	0.0832898	0.125878	0.02437	0.0200017	0.0117889	-0.0148371	0.00941365	0.0389134	-0.111181	0.0395667	-0.61935	0.0770613	0.0913251	0.252446	0.119862	-0.0855633	0.0437695	0.377446	0.143588	0.0365593	0.219224	1	-0.248609	0.249586	-0.26488	0.114009	0.0762244	0.294318	-0.0102698	-0.0861015	0.153644	-0.0526392	-0.0599053	0.112175	-0.136067	-0.149458	0.261456
		Verbal	0.274891	0.0898157	0.148582	-0.0496652	0.344581	-0.291051	-0.0999928	0.34608	0.253676	0.216385	0.0544361	-0.153992	-0.0472154	0.0152987	0.0225467	0.0582741	-0.0297878	0.0590052	0.0432472	-0.405723	0.2326	-0.370745	0.08562	-0.0678765	0.141741	0.262737	0.169594	-0.119073	0.0853904	0.0906787	-0.115076	-0.248609	1	0.278829	0.536942	0.158973	0.194652	-0.218244	-0.0150578	0.0136634	0.130034	0.165856	-0.0136669	0.121945	-0.0388742	0.209291	-0.301313
		Intellectual	0.175514	0.0881825	0.189603	-0.385246	-0.0179902	0.106153	0.192777	-0.0578614	-0.0546061	0.131108	0.0893533	0.17122	-0.0235947	0.112478	0.0516384	-0.0412513	0.0165016	0.108707	-0.0818105	-0.109998	-0.060663	-0.162691	0.0738993	0.0675919	0.0308309	0.0547116	-0.0092591	0.126657	0.101252	0.0656024	0.142338	0.249586	0.278829	1	0.285015	0.292164	0.256355	0.1905	0.058948	0.016809	0.332695	0.0812012	-0.0385797	0.14129	-0.293005	-0.0137208	0.110655
		English	0.111892	0.105897	0.0342361	-0.069435	0.132967	-0.251186	-0.0568622	0.257082	0.188266	0.130195	-0.00463552	-0.0320222	-0.0779286	0.0968187	0.013539	0.0991583	0.0250873	-0.0200509	0.108231	-0.134718	0.196575	-0.610954	0.0407403	-0.122237	0.0809978	0.445075	0.223357	-0.113721	0.060033	-0.00582475	-0.132092	-0.26488	0.536942	0.285015	1	0.00301541	0.0871928	-0.232097	-0.0117827	0.0481697	0.0949863	0.0590954	0.0831119	0.0337412	-0.0165394	0.153596	-0.198784
		Economy	0.130255	-0.0501938	0.17003	-0.213049	-0.0642504	0.176437	0.278501	-0.0642175	-0.000755485	0.275969	0.386663	0.316201	0.0826175	0.0325822	0.0720493	-0.0825013	-0.0291163	0.0834875	0.00642316	-0.0815797	-0.00815252	0.0109656	0.185066	-0.0324824	0.0116638	-0.0928006	0.0186115	0.0344202	0.0831541	0.293282	0.192064	0.114009	0.158973	0.292164	0.00301541	1	0.137929	0.164521	-0.02203	-0.00709956	0.112294	0.0469498	-0.249673	0.0495322	-0.165977	-0.0976638	0.0516427
		Relation with parents	0.297951	0.181948	0.331738	-0.28762	0.0390254	-0.0283472	0.00993674	-0.0221598	0.0753698	0.196617	0.0869023	0.0054311	0.0954006	0.106645	0.0589253	-0.0285874	-0.00719692	0.161419	0.116924	-0.0414544	-0.00518787	-0.0533841	-0.0859555	-0.057311	-0.118942	-0.0619797	0.00868286	-0.0626104	-0.0517199	0.0109495	0.00472657	0.0762244	0.194652	0.256355	0.0871928	0.137929	1	0.0307519	-0.0292246	-0.0961819	0.524342	0.237338	0.0454236	0.255858	-0.282581	0.00917127	0.00563252
		Technology	-0.0196163	-0.164337	0.124839	-0.19646	-0.0186124	0.777858	0.410279	-0.307658	-0.455606	-0.232365	-0.109717	0.429869	0.0796939	0.0572438	0.044467	-0.0922397	0.0107544	-0.0181616	-0.0720616	0.179112	-0.0445498	0.257553	0.190448	0.19397	-0.00182214	-0.159048	-0.0241795	0.307227	0.16079	0.0729261	0.482464	0.294318	-0.218244	0.1905	-0.232097	0.164521	0.0307519	1	0.00430402	0.146378	0.0933899	-0.0912624	-0.15919	-0.0227622	-0.0478874	0.00394586	0.622091
	Behavior	Risk behavior	0.282086	-0.0153216	-0.137637	-0.0378307	-0.051332	-0.00353124	-0.132807	-0.0558774	0.051363	0.142848	-0.0177784	0.0169622	0.198836	0.0150987	0.0863619	-0.213894	-0.100857	0.0287123	-0.104715	0.0588536	0.0949734	0.0310751	-0.155317	-0.160728	-0.178804	-0.0650391	-0.105075	-0.0218406	-0.0873984	-0.0720894	0.000651878	-0.0102698	-0.0150578	0.058948	-0.0117827	-0.02203	-0.0292246	0.00430402	1	0.438409	0.0422891	0.17857	-0.000912196	0.0161638	-0.020909	-0.118358	-0.037438
		Norm violation	0.165777	-0.180684	-0.25779	-0.034037	-0.0329374	0.180571	0.0144636	-0.0202416	-0.00569175	0.118819	-0.0476928	0.222854	0.247072	0.10603	0.107438	0.0106364	0.0594277	0.0148688	0.0451911	0.101627	0.197723	0.019386	-0.0147677	-0.0719591	-0.131445	-0.119076	-0.0605018	0.0377061	0.0391309	-0.133594	0.0372335	-0.0861015	0.0136634	0.016809	0.0481697	-0.00709956	-0.0961819	0.146378	0.438409	1	-0.0310347	0.0782626	-0.150839	-0.0674443	-0.0370776	-0.037531	0.0647444
		Life satisfaction	0.270442	0.238625	0.219564	-0.305253	-0.12199	0.058825	-0.00299569	-0.133049	-0.0295836	0.123696	0.0601375	0.102603	0.01184	0.159456	0.126202	-0.0556819	-0.0314746	0.103872	0.0513151	0.00900939	-0.00248857	-0.0516071	-0.0825641	-0.0558647	-0.0863183	-0.0260419	0.0221604	0.0283647	0.00900089	-0.0208951	0.0438654	0.153644	0.130034	0.332695	0.0949863	0.112294	0.524342	0.0933899	0.0422891	-0.0310347	1	0.162495	0.101422	0.142341	-0.332062	-0.105585	0.027195
Posttest	Bis Five	Extraversion	0.67793	0.132246	0.101613	-0.133236	0.102553	-0.150582	-0.259138	0.019104	0.222231	0.374585	0.0368793	-0.10884	0.056209	0.0711929	0.070497	0.069995	0.0203186	0.123491	0.0208674	-0.0303216	0.053627	-0.00379626	-0.251296	-0.167252	-0.228711	-0.123783	-0.133016	-0.132885	-0.167762	-0.161111	-0.161013	-0.0526392	0.165856	0.0812012	0.0590954	0.0469498	0.237338	-0.0912624	0.17857	0.0782626	0.162495	1	0.0568839	0.250698	-0.367649	0.0579473	-0.107271
		Agreeableness	0.00117091	0.473239	-0.0179205	-0.00857926	0.0628892	-0.165857	-0.214927	0.0835384	0.0519402	-0.141309	-0.145895	-0.167217	-0.0854814	0.039534	0.0533659	0.090195	0.0952713	-0.0578819	0.0206006	0.00366368	-0.00221348	-0.0137802	-0.156156	0.0244656	-0.0715928	0.0737879	0.0304149	-0.0893314	-0.0648634	-0.145586	-0.131071	-0.0599053	-0.0136669	-0.0385797	0.0831119	-0.249673	0.0454236	-0.15919	-0.000912196	-0.150839	0.101422	0.0568839	1	0.0716759	-0.14278	0.141151	-0.0576305
		Conscientiousness	0.214495	0.161499	0.401602	-0.084631	0.0272094	-0.0399435	-0.0532091	-0.0488325	0.0887818	0.16412	0.147385	-0.135545	-0.0207841	-0.0783886	-0.0436345	0.00942671	-0.207368	0.0329077	-0.0138683	-0.111507	-0.0475084	-0.0973014	-0.142993	-0.0509497	-0.10834	-0.00758586	-0.0312228	-0.122517	-0.0796842	-0.0956346	-0.0753256	0.112175	0.121945	0.14129	0.0337412	0.0495322	0.255858	-0.0227622	0.0161638	-0.0674443	0.142341	0.250698	0.0716759	1	-0.298841	0.00182924	-0.00619991
		Neuroticism	-0.210157	-0.121949	-0.015898	0.408205	0.164566	-0.0599634	-0.0458505	0.20973	0.112843	-0.0951999	-0.0185455	-0.179778	0.0113402	-0.0789883	-0.138152	0.0191155	0.0350092	-0.0921934	-0.034324	-0.0597442	-0.00215217	-0.0803299	0.122598	0.0359908	0.12954	0.128135	0.0310131	0.0116677	0.00751251	0.0168266	-0.0771479	-0.136067	-0.0388742	-0.293005	-0.0165394	-0.165977	-0.282581	-0.0478874	-0.020909	-0.0370776	-0.332062	-0.367649	-0.14278	-0.298841	1	0.128951	-0.0484983
		Openness	0.029017	0.00025639	0.0131511	0.0426104	0.569352	-0.0519493	0.0120735	0.482303	0.115972	-0.0521956	-0.173527	-0.0846938	-0.0144947	0.00602995	-0.0341111	0.133223	0.0764241	0.0132109	0.105073	-0.0579841	0.115277	-0.123093	0.00381857	0.0553896	-0.011874	0.106446	-0.00443849	-0.0528864	0.0228638	-0.0862448	-0.0497299	-0.149458	0.209291	-0.0137208	0.153596	-0.0976638	0.00917127	0.00394586	-0.118358	-0.037531	-0.105585	0.0579473	0.141151	0.00182924	0.128951	1	0.0574298
	Vocational interest orientations	Realistic	-0.0915356	-0.0776394	0.0157197	-0.0897306	-0.086959	0.695019	0.42549	-0.244835	-0.382973	-0.208491	-0.0494148	0.47183	0.0804467	-0.0403153	-0.0170964	-0.090337	-0.0316637	-0.0248261	-0.10616	0.193396	-0.105408	0.14766	0.149374	0.223333	-0.0132273	-0.12753	-0.040292	0.283185	0.167909	0.0280895	0.39674	0.261456	-0.301313	0.110655	-0.198784	0.0516427	0.00563252	0.622091	-0.037438	0.0647444	0.027195	-0.107271	-0.0576305	-0.00619991	-0.0484983	0.0574298	1
		Investigative	-0.111999	-0.0707933	0.0141859	-0.0669568	0.0806736	0.405267	0.589152	-0.0259851	-0.201609	-0.141032	-0.0260855	0.302451	0.0484882	-0.0240553	-0.0575653	-0.0353755	-0.0101033	-0.0160748	-0.0390391	0.0099772	-0.140406	-0.00113322	0.224705	0.223845	0.106479	0.00612578	0.0373372	0.189529	0.270803	0.148371	0.266632	0.197514	-0.1014	0.160744	-0.044492	0.136991	0.0160675	0.369888	-0.128428	-0.0296606	-0.00379063	-0.172249	-0.115452	-0.0239573	-0.0337502	0.139598	0.613196
		Artistic	0.00673657	0.0784147	-0.020547	0.187976	0.492105	-0.171621	-0.0300168	0.569889	0.228266	0.0289007	-0.0938343	-0.215636	-0.104284	0.0376039	-0.00950094	0.11727	0.0642007	0.0537708	0.112114	-0.109268	0.0655892	-0.206438	0.0149915	0.024832	-0.00772673	0.163766	0.0464502	-0.129628	-0.088312	-0.0509051	-0.158158	-0.216347	0.202611	-0.0782725	0.213727	-0.177173	-0.00077797	-0.215011	-0.0979401	-0.096348	-0.127588	0.0275714	0.135642	-0.0569056	0.146354	0.66122	0.0445173
		Social	0.147244	0.273887	0.0392421	0.165217	0.15866	-0.254875	-0.139417	0.271368	0.581732	0.245865	0.0445607	-0.283204	-0.0487806	0.108907	0.0607687	0.0178967	0.111258	0.057443	0.0873295	-0.112483	0.0187182	-0.0939662	-0.12436	-0.0968176	-0.092112	0.0109127	-0.0684792	-0.17263	-0.157176	-0.172825	-0.233624	-0.17269	0.107389	-0.12995	0.0479817	-0.0367634	0.0202041	-0.30899	-0.0686901	-0.0977422	-0.0423129	0.225821	0.179161	0.0233115	0.0132698	0.225202	-0.159127
		Enterprising	0.389857	0.054549	0.110922	-0.156688	0.00418665	-0.025789	-0.0148663	-0.028174	0.17421	0.461332	0.246775	0.0966927	0.0507596	0.0489785	0.0648894	0.0322182	-0.0832503	0.134781	0.00910708	-0.0832169	-0.027678	-0.0856843	-0.0841627	-0.0721551	-0.14772	-0.0770139	-0.0649407	-0.0514701	-0.0641053	-0.022458	-0.0181544	0.020233	0.0801586	0.030949	-0.00118243	0.255754	0.189017	-0.043837	0.0164419	0.068028	0.0812401	0.491057	-0.110262	0.269792	-0.308238	0.0412889	0.022804
		Conventional	0.104304	0.00929927	0.219485	-0.0170226	-0.0984793	-0.0342099	-0.00380235	-0.0736758	0.0681548	0.273241	0.471051	-0.0185451	0.00200077	-0.130763	-0.112059	0.0527113	-0.171789	0.0320356	-0.0883214	-0.0195787	-0.103724	-0.00760208	-0.0729772	0.0030867	-0.124745	-0.103903	-0.0583487	-0.0709143	-0.0895389	0.0162276	-0.00152688	0.124491	-0.0616608	-0.0105747	-0.131162	0.229499	0.105234	-0.0794036	0.00849373	-0.0624533	0.0201161	0.0832474	-0.0894213	0.372468	-0.154502	-0.148117	0.0769588
[truncated: 5 more columns]
